# Supplementary material for: Design and synthesis of Pd–MnO2 nanolamella–graphene composite as a high-performance multifunctional electrocatalyst towards formic acid and methanol oxidation
Source: Royal Society of Chemistry journal article supplement (doi:10.1039/c3cp51569a), 2013-01-01
Supplement: c3cp51569a.pdf [file c3cp51569a.pdf]

## Supporting materials for

Design and synthesis of Pd/MnO<sub>2</sub> nanolamella/graphene composite  
as a high-performance multifunctional electrocatalyst towards  
formic acid and methanol oxidation

Huajie Huang and Xin Wang\*

Key Laboratory of Soft Chemistry and Functional Materials (Nanjing University of  
Science and Technology), Ministry of Education, Nanjing 210094, China

\*To whom correspondence should be addressed. Tel.: +86-25-8431-5943; fax:  
+86-25-8431-5054. E-mail address: wangx@mail.njust.edu.cn (X. Wang)

Supplementary Results

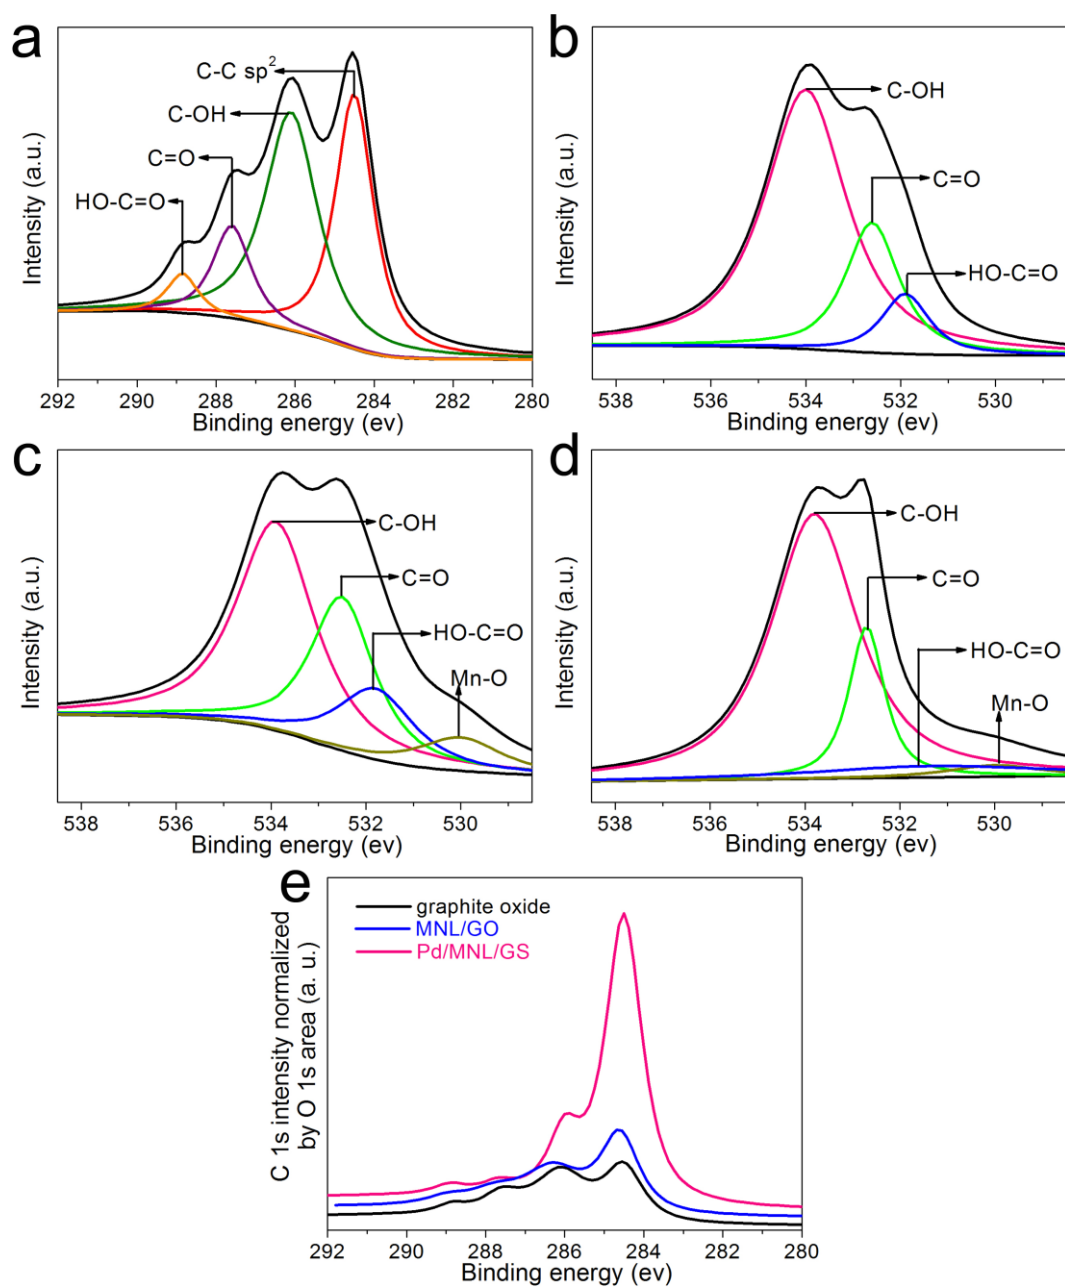

**Fig. S1** (a) C 1s core-level XPS spectrum of graphite oxide; O 1s core-level XPS spectra of (b) graphite oxide, (c) MNL/GO and (d) Pd/MNL/GS; (e) Normalized C 1s XPS spectra of graphite oxide, MNL/GO and Pd/MNL/GS.

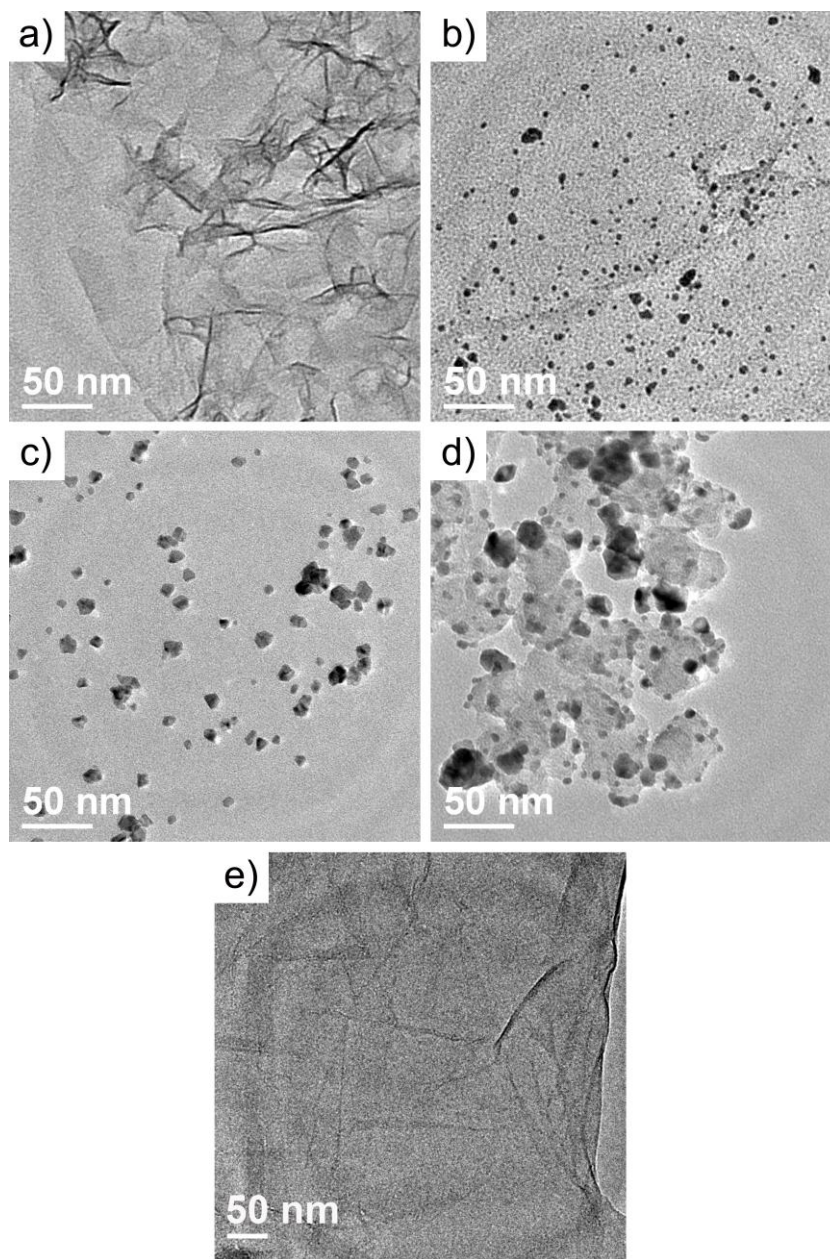

**Fig. S2** High magnification TEM images of (a) MNL/GO, (b) Pd/MNL/GS, (c) Pd/GS, (d) Pd/XC-72 and (e) GO.

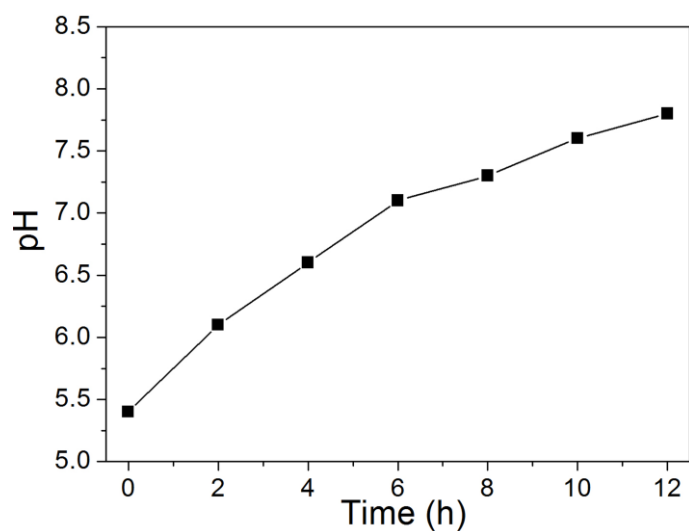

**Fig. S3** Dependence of the solution pH value on the reaction time.

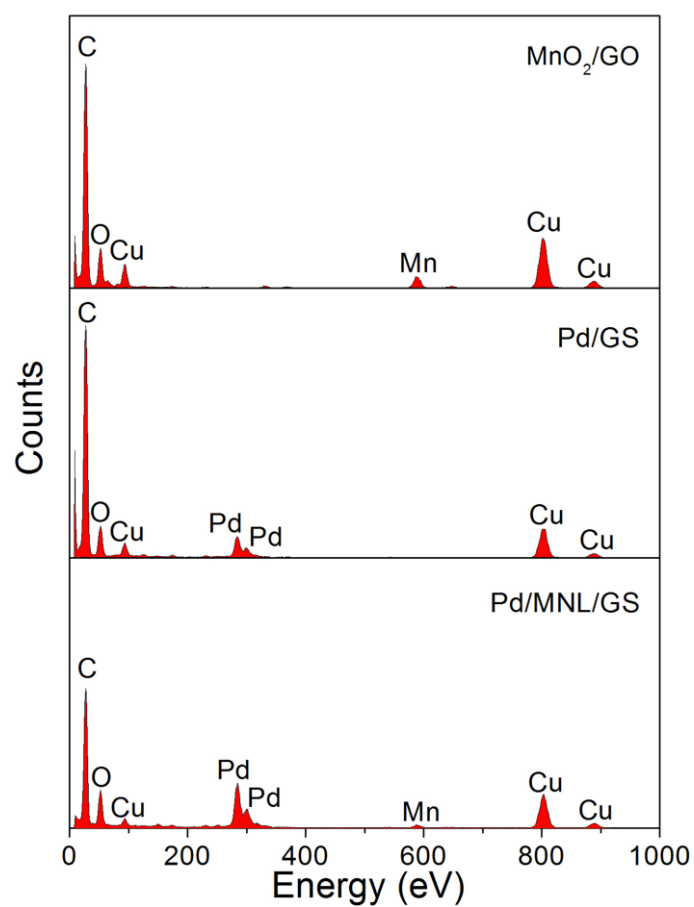

**Fig. S4** EDX spectra of (a) MNL/GO, (b) Pd/GS and (c) Pd/MNL/GS.

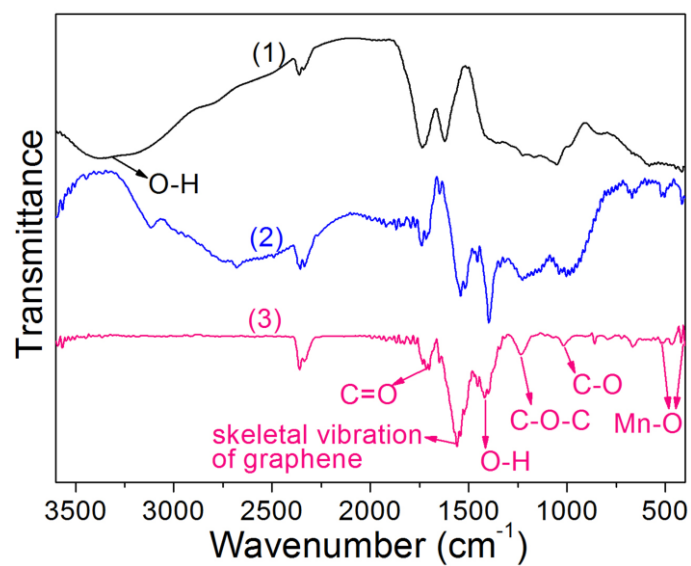

**Fig. S5** FT-IR spectra of (1) graphite oxide, (2) MNL/GO and (3) Pd/MNL/GS.

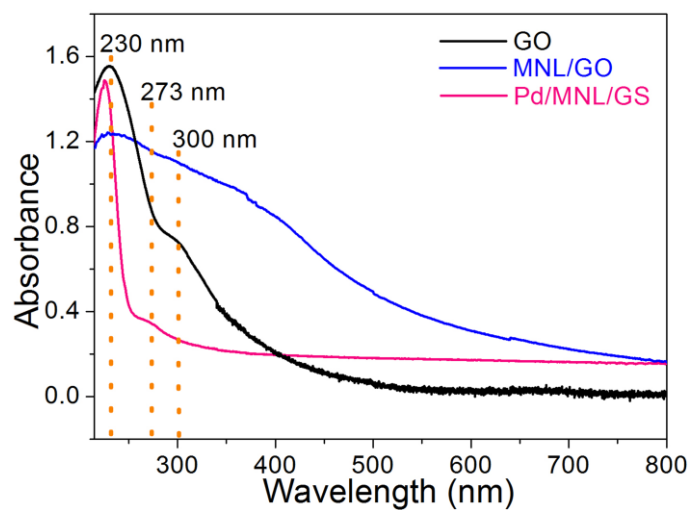

**Fig. S6** UV-vis absorption spectra of GO, MNL/GO and Pd/MNL/GS.

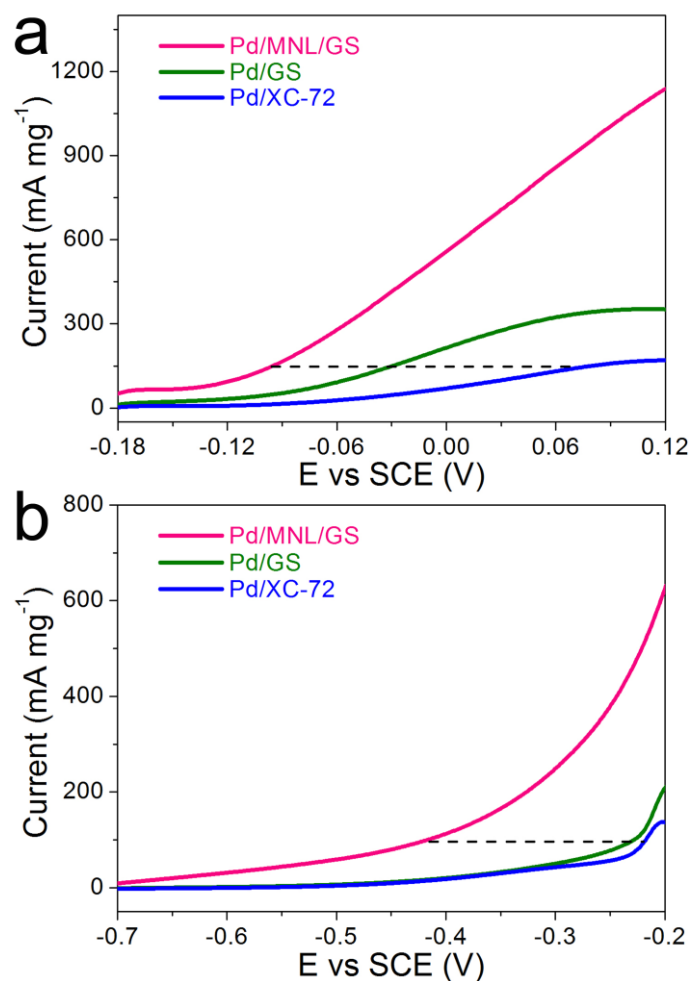

**Fig. S7** Linear sweep voltammograms of Pd/MNL/GS, Pd/GS and Pd/XC-72 in (a) 0.5 M H<sub>2</sub>SO<sub>4</sub> solution with 0.5 M HCOOH and (b) 0.5 M NaOH solution with 1 M methanol at 50 mV s<sup>-1</sup>.

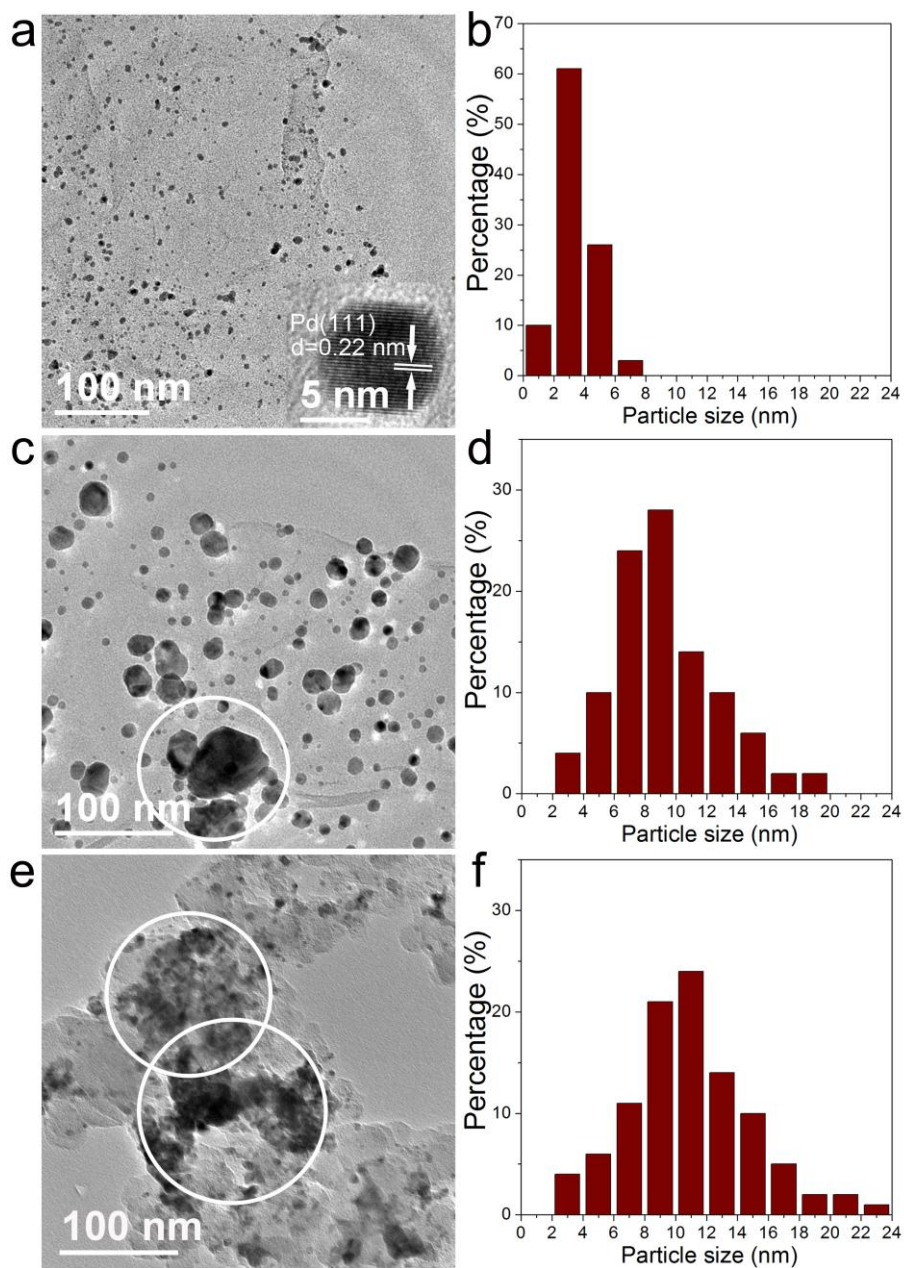

**Fig. S8** TEM images and histograms of Pd particle size distributions of the (a-b) Pd/MNL/GS, (c-d) Pd/GS and (e-f) Pd/XC-72 catalysts subjected to a durability test process. The inset of (a) is an HRTEM image of Pd/MNL/GS.

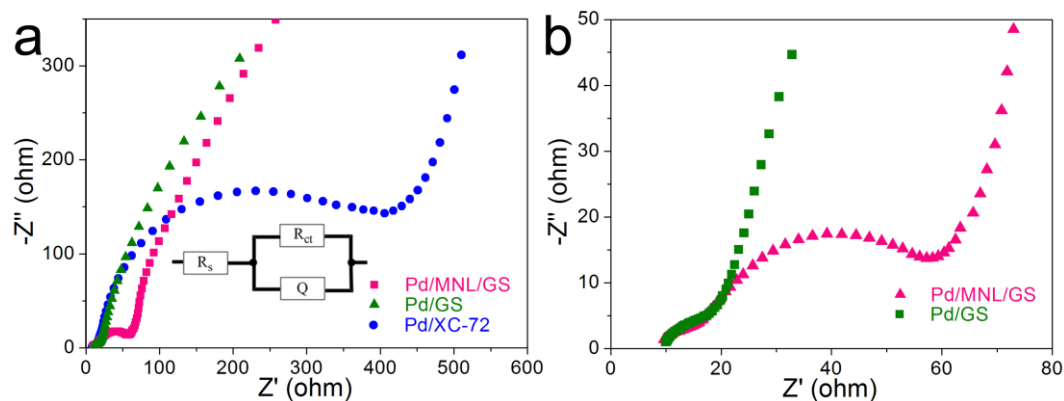

**Fig. S9** (a) Nyquist plots of EIS for Pd/MNL/GS, Pd/GS and Pd/XC-72 in 0.5 M  $\text{H}_2\text{SO}_4$  solution with 0.5 M  $\text{HCOOH}$ . The inset is the equivalent circuit used to fit the impedance spectra. (b) Local enlargement of the Nyquist plots for Pd/MNL/GS and Pd/GS.

**Table S1** Impedance components for Pd/MNL/GS, Pd/GS and Pd/XC-72 electrodes by fitting the experimental data using ZsimpWin software based on the equivalent circuit presented in the inset of Fig. S9a.

| Electrode | $R_{ct}$    |           |
|-----------|-------------|-----------|
|           | value (ohm) | error (%) |
| Pd/MNL/GS | 57.4        | 5.9       |
| Pd/GS     | 25.2        | 8.8       |
| Pd/XC-72  | 563.3       | 5.9       |
